# Supplementary material for: ShuTu: Open-Source Software for Efficient and Accurate Reconstruction of Dendritic Morphology
Source: PubMed Central journal article supplement (PMC6834530; doi:10.3389/fninf.2019.00068), 2019-10-31
Supplement: Data_Sheet_1.pdf [file Data_Sheet_1.pdf]

# Supplementary Material for *ShuTu: Open-Source Software for Efficient and Accurate Reconstruction of Dendritic Morphology*

Dezhe Z. Jin<sup>1\*</sup>, Ting Zhao<sup>2</sup>, David L. Hunt<sup>2</sup>, Rachel P. Tillage<sup>2</sup>, Ching-Lung Hsu<sup>2</sup>, Nelson Spruston<sup>2\*</sup>

1 Department of Physics and Center for Neural Engineering, the Pennsylvania State University, University Park, Pennsylvania, U.S.A

2 Janelia Research Campus, Howard Hughes Medical Institute, Ashburn, Virginia, U.S.A

\* Corresponding authors: Dezhe Z. Jin, dzj2@psu.edu, Nelson Spruston, sprustonn@janelia.hhmi.org

*Abbreviated title:* ShuTu

## 1 Comparison to other algorithms for automatic reconstruction

2 In this section, we provide further comparisons of accuracy of ShuTu, neuTube and Vaa3D on  
3 automated reconstruction of one tile covering part of the basal dendrite (Fig. 15).

4 A traditional way of assessing the accuracy of automated reconstructions is to compare to  
5 manual reconstructions (Acciai et al., 2016). We therefore also manually reconstructed dendrites  
6 in the tile utilizing the manual tracing capability of ShuTu’s GUI (see Fig. 11). We then com-  
7 pared the automated reconstructions to this manual reconstruction. Specifically, we computed  
8 the total length of the dendrites in the automated reconstruction that are within the vicinity of  
9 the manual reconstruction (“correct dendritic length”). The vicinity is defined as the volume  
10 around all pairs of connected SWC points, formed by two half cylinders and a trapezoidal prism  
11 (Fig. 6a). The edges of the prism are tangential to the spheres centered at the two SWC points,  
12 with the diameters set to those of the SWC points or at least  $0.4 \mu\text{m}$ . The height is set to the  
13 larger of the two diameters or at least  $3 \mu\text{m}$ . If the centers of the two connected SWC points in  
14 the automated reconstruction are within the vicinity, the distance between them are added to  
15 the correct dendritic length. Of the total dendritic length in the automated reconstructions, the  
16 percentage of the correct dendritic length was 97%, 91% and 55% for our algorithm, neuTube  
17 and Vaa3D, respectively. We also calculated the total dendritic length missed by automated  
18 reconstruction by subtracting the correct dendritic length from the total dendritic length of the

19 manual reconstruction. Of the total dendritic length in the manual reconstruction, the per-  
20 centage of the missed dendritic length was 8%, 32% and 46% for our algorithm, neuTube and  
21 Vaa3D, respectively. Hence our automated reconstruction covers more dendrites (see Fig. 15a-c).  
22 These measures show that our algorithm produced more accurate reconstruction than neuTube  
23 or Vaa3D.

## 24 **Appendix 1: Editing commands for ShuTu**

### 25 **Loading a project**

26 A reconstruction project can be opened by clicking on **Open Project** icon or **File** → **Open**  
27 **Project**. In the directory of the neuron, there should be a file `filenameCommon.tiles.json`,  
28 which is created after stitching the tiff stacks. Clicking on it opens **Tile View**, in which the 2D  
29 projections of the tiff stacks are shown. The 2D projection of the neuron should be visible. If  
30 there is a previous reconstruction of the neuron, which is stored in a file `filenameCommon.swc`,  
31 it will be automatically loaded and overlaid onto the 2D projection. The SWC file generated by  
32 the automated algorithm, `filenameCommon.auto.swc`, can be loaded by selecting **File** → **Load**  
33 **SWC**.

34 Double clicking on any tile in the **Tile View** loads the corresponding tiff stack in **Stack**  
35 **View**. The loaded SWC points are overlaid onto the tiff stack. To go up and down in the  
36  $z$ -dimension, use the right and left arrow keys. The functions of the arrow keys can be also  
37 performed with mouse wheel or track pad when available.

38 Clicking on **Make Projection** button creates 2D projection of the tiff stack. The user  
39 can specify the number of subdivisions used in the projection. All of the projections of the  
40 subdivisions are contained in the **Projection View**, which can be browsed with the left and  
41 right arrow keys.

42 The SWC structure is also displayed in **3D View**. It can be rotated with the arrow keys, and  
43 shifted with the arrow keys while pressing the **Shift** key.

44 In all views, zoom is controlled with + and - keys. After zooming in, different parts of the  
45 images can be navigated by pressing-dragging the mouse.

46 If the neuron is contained in a single tiff stack, load the tiff stack with **File** → **Open**. Other  
47 steps are the same as described above. Dark field tiff stack should be converted into bright field  
48 stack with **Tools** → **Invert Intensity**.

## 49 **Editing SWC points**

50 The SWC structure can be edited in **Stack View**, **Projection View**, and **3D View**. All editing  
51 can be reversed by **Ctrl-z** (or **Command-z** in Mac). Colors of SWC points indicate their topological  
52 roles in the structure: yellow and blue indicate the end points of branches; green the branching  
53 points; and red the interior points. Lines between SWC points indicate their connectivity.

54 In **Stack View**, an SWC point is plotted with a circle at its *xyz* position in the tiff stack.  
55 The radius of the circle is the same as that of the SWC point. As the focus plane shifts away  
56 from the *z* of the SWC point, the circle shrinks with its color fading. This helps the user to  
57 visually locate the *z* of the SWC points and inspect whether the positions and radii of the SWC  
58 points match the underlying signals of the neurites in the tiff stack.

59 Extension is the most commonly used editing function. In **Stack View**, it can be done in  
60 two ways. The first is manual extension. Click an SWC point to extend, and the cursor becomes  
61 a circle connected to the SWC point. Focus on the target neurite using the arrow keys, and  
62 match the radius of circle with that of the neurite using **e** and **q**. **Ctrl**-clicking on the target  
63 points creates a new SWC point connected to the starting SWC point. (In Mac, use **Command**  
64 instead of **Ctrl**.) The second is smart extension. It is the same as manual extension, except  
65 that the user clicks without pressing **Ctrl**. This method allows clicking far from the starting  
66 SWC points; the algorithm fills in additional connected SWC points along the neurites with  
67 the radii and depths automatically calculated. Smart extension works well when the underlying  
68 signal is reasonably strong.

69 To change the properties of a particular SWC point, select it by clicking on it and pressing

70 **Esc** to come out of the extension mode. The radius can be changed with **e** and **q**. It can be  
71 moved with **w,s,a,d** for up, down, left, right. Pressing **x** deletes it.

72 To connect two SWC points, click on the first point and **Shift**-click on the second point,  
73 then press **c**. Pressing **Shift-c** after selecting two points automatically fills additional SWC  
74 points, similarly as in the smart extension. To disconnect two SWC points, select them then  
75 press **b**.

76 In **Projection View**, 2D projections of the subdivisions of the tiff stack are overlaid with the  
77 SWC points. In this view it is easier to spot missed branches and incorrect connections. There  
78 is also a mask-to-SWC method for tracing branches. To draw a mask along a branch, press **r**.  
79 The cursor becomes a red dot. Roughly match the radius of the dot with that of neurite with **e**  
80 and **q**. Click on the start point, then **Shift**-click on the target. A red mask will be drawn along  
81 the branch. Clicking on **Mask** → **SWC** button converts the mask into SWC points, which can be  
82 examined in detail in the **Stack View**. The mask can also be drawn manually by press-dragging  
83 the mouse along the branch. To get of out the mask drawing mode, press **Esc**.

84 Clicking on an SWC point selects it. Pressing **z** locates the selected point in the **Stack View**,  
85 and its **z** position and other properties can be further examined with the tiff stack.

86 The user can directly modify the connections in the **Projection View**. The operations are  
87 the same as in the **Stack View**.

88 In **3D View**, the user can examine and modify the connections between SWC points. Con-  
89 necting or breaking connections between two SWC points is the same as in the **Stack View** and  
90 the **Projection View**. Selecting an SWC point and pressing **z** locates it in the **Stack View** for  
91 further examination and extension. This operation also loads a new tiff stack if the selected  
92 point is not in the current tiff stack.

93 A useful way of locating broken points in the SWC structure is the operation that selects all  
94 connected SWC points to the selected SWC point. It is done by pressing **h-3**, or right-clicking  
95 the mouse and selecting **Select** → **All connected nodes**.

96 After correctly connecting all SWC points belonging to the neuron, the user can delete all

97 noise points simply by selecting all SWC points in the neuron, right-clicking the mouse, and  
98 performing `delete unselected`.

## 99 **Annotating, saving, and scaling the SWC structure**

100 After the reconstruction is done, the user needs to annotate the SWC points as soma, axon, apical  
101 dendrite, basal dendrite. This is best done in `3D View`. In the panel `control and settings`,  
102 change `Color Mode` to `Branch Type` to reveal the types of SWC points. To annotate the soma,  
103 the user can select one point in the soma, right-click the mouse, and select `Change Property` →  
104 `Set as root`. More SWC points belong to the soma can be selected by `Shift`-clicking. Then  
105 right-click to bring up the menu, then select `Change type` and set the value to 1. The SWC  
106 points in the soma are shown in blue.

107 To annotate the axon, select the one SWC point closest to the soma, and press `h-1`. This  
108 selects all SWC points down stream of the selected point. Then change type to 2. Basal dendrites  
109 and apical dendrite can be similarly annotated, and their types are 3 and 4, respectively.

110 In the panel `control and settings`, setting `Geometry` to `normal` produces the volume  
111 representation of the SWC structure, with surface rendered between adjacent SWC points.

112 To save the reconstruction, click on the objects in the panel `Objects`, which selects the  
113 corresponding SWC points. Then in the window of the SWC structure, left-click and do `save`  
114 `as`. It is best to use the default filename `filenameCommon.swc`.

115 The dimensions of the SWC points in `filenameCommon.swc` are pixel based. To convert  
116 them into physical dimensions in  $\mu\text{m}$ , type in the terminal

```
117 ./scaleSWC dataDir ShuTu.Parameters.dat
```

118 This process uses `xyDist` and `zDist` in `ShuTu.Parameters.dat`, which specify in  $\mu\text{m}$  the `xy`  
119 pixel distance and `z` distance between successive planes. The results are saved in  
120 `filenameCommon.scaled.swc`.

121 Right after finishing the reconstruction and with `ShuTu` closed, the number of various editing  
122 operations can be analyzed using the command

123 `python analyzeNEO.py`

124 This requires the user to install Python 2.7. A plot similar to Fig. 13c will be generated. The  
125 script `analyzeNEO.py` parses the log file generated by `ShuTu`. The log file can contain several  
126 neuron reconstruction sessions, but the script only parses the most recent one. When estimating  
127 the total time of manual editing, idle times of the user are excluded if they are detected in the  
128 log file. The log file is assumed to be at

129 `~/neutube.z/log.txt`

130 If the log file is in other locations, the user can use command

131 `python analyzeNEO.py logFileDir/log.txt.`

132 There are many more editing functions in `ShuTu`. The user can refer to `Help` for more  
133 instructions.

## 134 **Shortcut keys**

135 There are shortcut keys for many editing operations in `Stack View`, `3D View`, and `Projection`  
136 `View`. These are summarized in Tables 1-4.

## 137 **Appendix 2: Technical details of automated reconstruction**

138 Here we provide technical details of the automated reconstruction algorithm presented in the  
139 main text. These details should help the users to adjust parameters for their specific needs, and  
140 facilitate further development of the algorithm. The parameters in each step are summarized in  
141 series of tables. The algorithm is explained with the same example used in the main text.

### 142 **Coordinate system**

143 A tiff stack consists of successive 2D images (referred to as planes) taken at increasing depths  
144 at regular intervals. We denote a pixel in a tiff stack with coordinates  $(x, y, z)$ . Here  $x, y$  are

145 the pixel positions in the planes, and  $z$  is the depth. We take the convention that in a plane,  
146 the  $x$  axis points vertically downwards and the  $y$  axis horizontally to the right (Fig. 1).

147 The distance between neighboring pixels in  $x$  and  $y$  is denoted as  $d_{xy}$ . The distance between  
148 successive planes is denoted as  $d_z$ . In the example,  $d_{xy} = 0.065 \mu\text{m}$  (`xyDist`, name in the  
149 parameter file), and  $d_z = 0.5 \mu\text{m}$  (`zDist`; Table 5).

## 150 Preprocessing

Our algorithm requires that the images are grayscale with bright background. Other image  
types must be converted into bright-field grayscale images, and this is done in preprocessing. In  
particular, color images are converted into grayscale according to

$$I(x, y, z) = 0.21I_r(x, y, z) + 0.72I_g(x, y, z) + 0.07I_b(x, y, z),$$

151 where  $I$  is the intensity of the grayscale and  $I_r, I_g, I_b$  are those of the red, green, and blue  
152 channels. Dark-field images are inverted by subtracting the grayscale intensity at each pixel  
153 from the maximum intensity of the tiff stack. To reduce pixel noise, each plane is smoothed  
154 with 2D Gaussian filter with  $\sigma = 1$  pixel. The intensity is scaled so that the maximum is 1 for  
155 the tiff stack.

## 156 2D projection

157 We identify neurites in a tiff stack from its minimum-intensity 2D projection. The intensity  
158  $I(x, y)$  of the 2D projection is taken as the minimum intensity among all pixels with the same  
159  $z$ . Projections of dendritic branches form dark paths in  $I(x, y)$  (Fig. 3a). Shadows of branches  
160 in out-of-focus planes (Fig. 2d) do not create separate dark paths in the 2D projection; instead,  
161 their projections flank those of the branches, forming smooth decay of intensity away from the  
162 center lines of the branches. The problem of confusing the shadows of the branches as neurites  
163 in the out-of-focus planes, as shown in Fig. 2d, does not exist in the 2D projection.

164 To eliminate smooth variations of the background due to uneven lighting, we subtract from

165  $I(x, y)$  a background, which is obtained by blurring  $I(x, y)$  with a Gaussian filter with standard  
 166 deviation  $\sigma_b = 2 \mu\text{m}$  (`sigmaBack`; Fig. 3b). We then normalize the range of  $I(x, y)$  to  $(0, 1)$   
 167 (Fig. 3c). Smaller  $\sigma_b$  enhances weak signals relative to strong signals (Fig. 3d). This is because  
 168 the background with smaller  $\sigma_b$  tracks the signal strength more closely, and when subtracted,  
 169 takes away more from the strong signals. But  $\sigma_b$  should be large enough to ensure that the  
 170 subtracted background is smooth and does not weaken the signals.

## 171 Binary mask

172 From the 2D projection we create a binary image  $b(x, y)$  to indicate pixels that belong to neurites.  
 173 Specifically,  $b(x, y) = 1$  for pixels in the neurites (foreground pixels) and  $b(x, y) = 0$  for those  
 174 in the background (background pixels). We call the area defined by the foreground pixels as  
 175 binary mask.

The first step in creating the mask is convolving  $I(x, y)$  with valley detectors with varying orientations, and finding the maximum and minimum responses to the detectors (Fig. 3e). A valley detector  $f(x, y)$  is a patch of 2D image (or filter) consisting of an oriented dark band flanked by two bright bands. Mathematically the filter is expressed as

$$f(x, y) = \frac{1}{2\pi\sigma^2} \frac{\partial^2}{\partial\tau^2} e^{-(x^2+y^2)/2\sigma^2},$$

which is a directional second derivative of a Gaussian with standard deviation  $\sigma$ . Here

$$\frac{\partial}{\partial\tau} = \hat{\tau} \cdot \nabla = \tau_x \frac{\partial}{\partial x} + \tau_y \frac{\partial}{\partial y},$$

176 where  $\hat{\tau} = \tau_x \hat{x} + \tau_y \hat{y}$  is a unit vector perpendicular to the orientation of the dark band.

177 Convolution of  $I(x, y)$  with the filter creates the response  $R(x, y)$ :

$$\begin{aligned} R(x, y) &= \int dx' dy' I(x + x', y + y') f(x', y') \\ &= I_{xx} \tau_x^2 + 2I_{xy} \tau_x \tau_y + I_{yy} \tau_y^2, \end{aligned} \tag{1}$$



where

$$I_{xx} = \frac{1}{2\pi\sigma^4} \int dx' dy' I(x+x', y+y') \left( \frac{x'^2}{\sigma^2} - 1 \right) e^{-(x'^2+y'^2)/2\sigma^2},$$

$$I_{xy} = \frac{1}{2\pi\sigma^4} \int dx' dy' I(x+x', y+y') \frac{x'y'}{\sigma^2} e^{-(x'^2+y'^2)/2\sigma^2},$$

$$I_{yy} = \frac{1}{2\pi\sigma^4} \int dx' dy' I(x+x', y+y') \left( \frac{y'^2}{\sigma^2} - 1 \right) e^{-(x'^2+y'^2)/2\sigma^2}.$$

We obtain the maximum or minimum response at  $(x, y)$  using the Lagrange multiplier method:

$$R' = I_{xx}\tau_x^2 + 2I_{xy}\tau_x\tau_y + I_{yy}\tau_y^2 - \lambda(\tau_x^2 + \tau_y^2 - 1).$$

At the extrema we have

$$0 = \frac{\partial R'}{\partial \tau_x} = 2(I_{xx} - \lambda)\tau_x + 2I_{xy}\tau_y,$$

$$0 = \frac{\partial R'}{\partial \tau_y} = 2I_{xy}\tau_x + 2(I_{yy} - \lambda)\tau_y.$$

178 These are linear equations, which can be expressed in matrix form as

$$\begin{pmatrix} I_{xx} - \lambda & I_{xy} \\ I_{xy} & I_{yy} - \lambda \end{pmatrix} \begin{pmatrix} \tau_x \\ \tau_y \end{pmatrix} = 0. \quad (2)$$

To have none-zero solutions for  $\tau_x$  and  $\tau_y$ , we must have

$$\begin{vmatrix} I_{xx} - \lambda & I_{xy} \\ I_{xy} & I_{yy} - \lambda \end{vmatrix} = 0,$$

where  $\lambda$  is the eigenvalue of the Hessian matrix. There are two solutions:

$$\lambda_1(x, y) = \frac{1}{2} \left( I_{xx} + I_{yy} + \sqrt{(I_{xx} - I_{yy})^2 + 4I_{xy}^2} \right),$$

$$\lambda_2(x, y) = \frac{1}{2} \left( I_{xx} + I_{yy} - \sqrt{(I_{xx} - I_{yy})^2 + 4I_{xy}^2} \right).$$

Here we chose  $\lambda_1(x, y) > \lambda_2(x, y)$ . Solving  $\tau_x$  and  $\tau_y$  from Eq. (2) and plugging in to Eq. (1), we find the response at the extrema:

$$R(x, y) = \tau_x^2 I_{xx} + 2I_{xy}\tau_x\tau_y + I_{yy}\tau_x^2 = \lambda(\tau_x^2 + \tau_y^2) = \lambda.$$

Hence the maximum  $R_m(x, y)$  of the responses  $R(x, y)$  to valley detectors at varying orientations is given by

$$R_m(x, y) = \lambda_1(x, y).$$

179 To see how we can create the mask from  $\lambda_1(x, y)$  and  $\lambda_2(x, y)$ , we exam three simple examples  
 180 of synthetic 2D images containing some aspects of 2D projections of the real images containing  
 181 neurites.

The first example is a Gaussian valley in  $y$  direction:

$$I(x, y) = I_0 - \frac{I_1}{\sqrt{2\pi}\sigma_s} e^{-x^2/2\sigma_s^2}.$$

182 Here  $\sigma_s$  is the scale of the widths of the valley;  $I_0$  is the baseline intensity; and  $I_1$  is the amplitude.  
 183 This is an idealized model of the 2D projection of a dendritic segment with half-width  $\sigma_s$ . An  
 184 ideal mask for this Gaussian valley is a rectangular strip spanning the  $y$  direction, centered long  
 185  $y$ -axis and with half-width  $\sigma_s$ .

$\lambda_1(x, y)$  and  $\lambda_2(x, y)$  are easily calculated. We find that

$$I_{xx} = \frac{I_1}{\sqrt{2\pi}(\sigma^2 + \sigma_s^2)^{3/2}} \left( 1 - \frac{x^2}{\sigma^2 + \sigma_s^2} \right) e^{-x^2/2(\sigma^2 + \sigma_s^2)},$$

and

$$I_{xy} = I_{yy} = 0.$$

Therefore,

$$\lambda_1 = \begin{cases} I_{xx}, & \text{if } I_{xx} \geq 0, \\ 0, & \text{if } I_{xx} < 0. \end{cases}$$

$$\lambda_2 = \begin{cases} 0, & \text{if } I_{xx} \geq 0, \\ I_{xx}, & \text{if } I_{xx} < 0. \end{cases}$$

We can obtain a mask close to the ideal mask by thresholding  $\lambda_1(x, y)$ . If we set the foreground pixels as those with  $\lambda_1(x, y) > 0$ , the boundary of the mask is given by

$$x_b = \pm\sqrt{\sigma^2 + \sigma_s^2}.$$

186 The half-width of the mask is  $\sqrt{\sigma^2 + \sigma_s^2}$ , and it is larger than  $\sigma_s$ . Taking  $\sigma \rightarrow 0$  leads to the  
 187 ideal mask. For finite  $\sigma$ , it is possible to set a higher threshold for  $\lambda_1(x, y)$  and obtain the ideal  
 188 mask; but this requires a threshold that depends on the width of the valley.

189 From this example we see that we can obtain a mask that closely follow dendritic branches  
 190 by thresholding the maximum responses to the valley detectors,  $\lambda_1(x, y)$ . The threshold should  
 191 be larger than 0. Larger  $\sigma$  for the detectors tends to broaden the mask; therefore it is desirable  
 192 to have small  $\sigma$  to obtain masks that closely cover the dendritic branches.

The second example is a Gaussian blob:

$$I(x, y) = I_0 - \frac{I_1}{2\pi\sigma_s^2} e^{-(x^2+y^2)/2\sigma_s^2}.$$

193 This is an idealized model for the 2D projections of spills created during the staining process  
 194 (Fig. 2a). Such spills are noise that should be eliminated; therefore the ideal mask for a Gaussian  
 195 blob should be empty.

We find that

$$I_{xx} = \frac{I_1}{2\pi(\sigma^2 + \sigma_s^2)} \left( 1 - \frac{x^2}{\sigma^2 + \sigma_s^2} \right) e^{-(x^2+y^2)/2(\sigma^2+\sigma_s^2)},$$

$$I_{xy} = -\frac{I_1 xy}{2\pi(\sigma^2 + \sigma_s^2)^2} e^{-(x^2+y^2)/2(\sigma^2+\sigma_s^2)},$$

$$I_{yy} = \frac{I_1}{2\pi(\sigma^2 + \sigma_s^2)} \left(1 - \frac{y^2}{\sigma^2 + \sigma_s^2}\right) e^{-(x^2+y^2)/2(\sigma^2+\sigma_s^2)}.$$

Therefore,

$$\lambda_1(x, y) = \frac{I_1}{\pi(\sigma^2 + \sigma_s^2)} e^{-(x^2+y^2)/2(\sigma^2+\sigma_s^2)},$$

$$\lambda_2(x, y) = \frac{I_1}{\pi(\sigma^2 + \sigma_s^2)} \left(1 - \frac{x^2 + y^2}{\sigma^2 + \sigma_s^2}\right) e^{-(x^2+y^2)/2(\sigma^2+\sigma_s^2)}.$$

196 We see that thresholding the maximum responses  $\lambda_1$  creates a circular mask, which is far from  
 197 the desired empty mask. To suppress creating foreground pixels for the Gaussian blob, additional  
 198 criteria for the mask are needed. We notice that near the center of Gaussian blob,  $\lambda_1$  and  $\lambda_2$   
 199 are approximately equal. This motivates another criterion for the mask: in addition to  $\lambda_1$  being  
 200 greater than a threshold, the foreground pixels must satisfy the condition  $\lambda_1 > \alpha_\lambda |\lambda_2|$ , where  
 201  $\alpha_\lambda > 1$  is a factor. This criterion should suppress foreground pixels for the Gaussian blob, except  
 202 around a ring near the radius  $\sqrt{\sigma^2 + \sigma_s^2}$ , where  $\lambda_2$  is close to zero. This is not the ideal mask  
 203 for Gaussian blob, but it is close. Note that this additional criterion does not affect the mask  
 204 for the Gaussian valley in the first example, hence does not interfere with detection of dendritic  
 205 branches.

The third example is a random image, which has a mean intensity  $I_0$  and no correlations between the pixels:

$$\langle (I(x, y) - I_0)(I(x', y') - I_0) \rangle = \sigma_I^2 \delta(x - x', y - y').$$

206 Here  $\sigma_I^2$  is the variance of the pixel intensity. This is an idealized model for random pixel noise  
 207 in the real images. The ideal mask should be empty.

It is easy to see that

$$\langle I_{xx} \rangle = \langle I_{xy} \rangle = \langle I_{yy} \rangle = 0.$$

Additionally,

$$\begin{aligned}\langle I_{xx}^2 \rangle &= \langle I_{yy}^2 \rangle = \frac{3\sigma_I^2}{16\pi\sigma^6}, \\ \langle I_{xy}^2 \rangle &= \langle I_{xx}I_{yy} \rangle = \frac{\sigma_I^2}{16\sigma^6}, \\ \langle I_{xx}I_{xy} \rangle &= \langle I_{yy}I_{xy} \rangle = 0.\end{aligned}$$

From these we find the mean of the responses

$$\langle R(x, y) \rangle = 0,$$

and the variance

$$\sigma_R^2 = \langle R(x, y)^2 \rangle = \frac{3\sigma_I^2}{16\pi\sigma^6},$$

208 where we have used  $\tau_x^2 + \tau_y^2 = 1$ .  $\sigma_R$  represents the range of the responses expected from random  
 209 fluctuations of the intensity. To avoid creating foreground pixels for random fluctuations, we  
 210 should set the threshold for  $\lambda_1$  larger than  $\sigma_R$ . But a threshold that is too large diminishes  
 211 the mask for dendritic branches. Therefore the threshold for  $\lambda_1$  must be chosen to preserve  
 212 the signals while suppressing random noise. Inevitably, some foreground pixels to noise are  
 213 unavoidable, which creates random speckles in the mask (Fig. 3h).

A guideline for selecting the length scale  $\sigma$  in the valley detectors can be devised by combining the insights from the Gaussian valley and the random image. The peak of the maximum responses from the Gaussian valley, which occurs at  $x = 0$ , is given by

$$\lambda_{1,\max} = \frac{I_1}{\sqrt{2\pi}(\sigma^2 + \sigma_s^2)^{3/2}}.$$

Comparing this to the variance of the responses to the random image, we can define the signal-to-noise ratio as

$$\rho_s = \frac{\lambda_{1,\max}}{\sigma_R} = \frac{4I_1}{\sqrt{6}\sigma_I} \left( \frac{\sigma^2}{\sigma^2 + \sigma_s^2} \right)^{3/2}.$$

214 This ratio is an increasing function of  $\sigma$ . Therefore, a large  $\sigma$  is useful for suppressing noise. How-  
 215 ever, a large  $\sigma$  overestimates the width of the valley (given by  $\sqrt{\sigma^2 + \sigma_s^2}$ ), leading to widening  
 216 of the foreground pixels. For real images, such widening can create a mask that merges nearby  
 217 branches, leading to an inaccurate representation of the neuronal structure. Hence the choice  
 218 of  $\sigma$  is a compromise between enhancing the signal-to-noise ratio while avoiding the merger of  
 219 nearby branches in the mask. When the intensity fluctuation is small, we can select a small  $\sigma$ ,  
 220 leading to an accurate mask. If the fluctuation is large, we need to choose a large  $\sigma$  and live  
 221 with the imperfect mask.

222 Based on the insights gained from the examples discussed above, we formulate the following  
 223 procedure for creating the mask  $b(x, y)$  from  $\lambda_1(x, y)$  and  $\lambda_2(x, y)$ . Select  $\sigma$  of the valley detector  
 224 such that the neurites are clearly visible in  $\lambda_1(x, y)$  (Fig. 3d). Set  $b(x, y) = 0$  with  $\lambda_1 < \alpha_\lambda |\lambda_2|$   
 225 to suppress circular blobs in the 2D projection. Select a threshold  $\theta_\lambda$  above the noise level, and  
 226 set  $b(x, y) = 1$  if  $\lambda_1(x, y) > \theta_\lambda$  and  $b(x, y) = 0$  otherwise (Fig. 3e). Since pixels belonging to  
 227 the neurites typically have higher  $\lambda_1$  compared to those with random fluctuations, we set the  
 228 threshold  $\theta_\lambda$  such that the fraction of pixels selected to the mask is  $f_\lambda$ . For our example neuron,  
 229 the parameter values are:  $\sigma = 0.1 \mu\text{m}$  (`sigmaFilter`),  $\alpha_\lambda = 10$  (`lambdaRatioThr`), and  $f_\lambda = 0.1$   
 230 (`sparse`; Table 6).

231 The binary mask generated as above is noisy, and the boundaries for neurites are rugged  
 232 (Fig. 3h). To clean up noise and smooth the boundaries, we use the sparse-field level-set method  
 233 outlined in (Lankton, 2009), which is a technical report based on (Whitaker, 1998). The details  
 234 of level-set smoothing is as follows.

For the 2D projection  $I(x, y)$  after background subtraction and normalization, we compute the gradient

$$g_r(x, y) = \sqrt{I_x^2 + I_y^2}.$$

We rescale the gradient so that the range is from 0 to 1. An edge indicator is defined as

$$g(x, y) = \frac{1}{1 + g_r^\beta},$$

where  $\beta$  is an exponential, typically smaller than 1, for compressing the gradient values. This function is minimal at edges of branches, where the gradients are larger. We seek a contour  $\mathcal{C}$  such that the energy function

$$\mathcal{E} = \mu L[\mathcal{C}] + \oint_{\mathcal{C}} dl g(l)$$

235 is minimized, where  $L[\mathcal{C}]$  is the total length of the contour and  $\mu$  is weight parameter that controls  
 236 the smoothness of the contour. The curve that minimize this energy function will be smooth  
 237 and sit along the maximum gradient boundaries between the branches and the background.

The contour can be expressed as the zero-crossing points of a level set function  $\phi(x, y)$ . Inside  $\mathcal{C}$ , we have  $\phi > 0$ , and outside  $\phi < 0$ . Note that

$$L[\mathcal{C}] = \oint_{\mathcal{C}} dl.$$

The unit vectors normal to the contours in  $\phi$  are given by

$$\hat{n} = -\frac{\nabla\phi}{|\nabla\phi|}.$$

Hence

$$L[\mathcal{C}] = \oint_{\mathcal{C}} dl \hat{n} \cdot \hat{n} = - \oint_{\mathcal{C}} dl \hat{n} \cdot \frac{\nabla\phi}{|\nabla\phi|} = - \int_{\mathcal{C}} dx dy \nabla \cdot \frac{\nabla\phi}{|\nabla\phi|}.$$

The last step uses the divergence theorem. Note that

$$- \int_{\mathcal{C}} dx dy \nabla \cdot \frac{\nabla\phi}{|\nabla\phi|} = - \int dx dy H(\phi) \nabla \cdot \frac{\nabla\phi}{|\nabla\phi|}.$$

Here  $H(\phi)$  is the step function; it is 1 if  $\phi > 0$  and 0 if  $\phi < 0$ . Integration by part gives

$$- \int dx dy H(\phi) \nabla \cdot \frac{\nabla\phi}{|\nabla\phi|} = \int dx dy \frac{\nabla\phi}{|\nabla\phi|} \cdot \nabla H(\phi) = \int dx dy \frac{\nabla\phi}{|\nabla\phi|} \cdot \nabla \phi \delta(\phi) = \int dx dy \delta(\phi) |\nabla\phi|.$$

The surface term is zero because  $H$  is zero at the boundary. Here  $\delta(\phi)$  is the Dirac  $\delta$ -function.

Therefore, we have

$$L[\mathcal{C}] = \int dx dy \delta(\phi) |\nabla \phi|.$$

Similarly, we can derive

$$\oint_{\mathcal{C}} dl g(l) = \oint_{\mathcal{C}} dl \hat{n} \cdot (g \hat{n}) = \int dx dy \delta(\phi) g(x, y) |\nabla \phi|.$$

Hence, we have

$$\mathcal{E} = \int dx dy (\mu + g(x, y)) \delta(\phi(x, y)) |\nabla \phi(x, y)|.$$

We use the variational method to find the  $\phi$  that minimizes  $\mathcal{E}$ . Noting that

$$|\nabla(\phi + \delta\phi)| = \sqrt{|\nabla\phi|^2 + 2\nabla\phi \cdot \nabla\delta\phi} = |\nabla\phi| + \frac{\nabla\phi \cdot \nabla\delta\phi}{|\nabla\phi|},$$

we find

$$\delta|\nabla\phi| = \frac{\nabla\phi \cdot \nabla\delta\phi}{|\nabla\phi|}.$$

Applying integration by part, we have

$$\delta\mathcal{E} = \int dx dy \left[ -\delta(\phi) \nabla \cdot \left( (\mu + g) \frac{\nabla\phi}{|\nabla\phi|} \right) \right] \delta\phi.$$

Setting  $\mathcal{E} = 0$ , we find

$$-\delta(\phi) \nabla \cdot \left( (\mu + g) \frac{\nabla\phi}{|\nabla\phi|} \right) = 0.$$

The surface term in the integration vanishes if we impose the Neumann boundary condition

$$\frac{\partial\phi}{\partial n} = 0.$$

At equilibrium and on  $\mathcal{C}$  we have

$$-\nabla \cdot \left( (\mu + g) \frac{\nabla\phi}{|\nabla\phi|} \right) = 0.$$



At other points,  $\phi$  can be arbitrary. Minimization of

$$\delta\mathcal{E} = \int dx dy f[\phi] \delta\phi$$

can be done by solving the equation

$$\frac{\partial\phi}{\partial t} = -f[\phi].$$

This equation implies

$$\delta\phi = -dt f[\phi]$$

at each time step. Therefore

$$\delta\mathcal{E} = - \int dx dy f[\phi]^2 dt < 0,$$

leading to decreasing  $\mathcal{E}$ . In our case, we need to evolve

$$\frac{\partial\phi}{\partial t} = \nabla \cdot \left( (\mu + g) \frac{\nabla\phi}{|\nabla\phi|} \right) = F$$

238 on the boundary. For  $\phi$  at points other than the boundary, we need to change  $\phi$  such that it  
 239 remains a smooth function around the boundary and the second derivatives can be computed.  
 240 We used the sparse-field implementation for solving this differential equation, which iteratively  
 241 updates the sets of points near the boundary (Lankton, 2009). After  $N_{levelset}$  number of it-  
 242 erations, we obtain a new binary mask by setting  $b(x, y) = 1$  if  $\phi(x, y) > 0$ , and  $b(x, y) = 0$   
 243 otherwise.

In practice, we observe that it is sufficient to smooth the initial mask by minimizing the length of the boundary alone. Hence we set the edge indicator

$$g(x, y) = 0.$$

244 This is because the boundaries of the initial mask are already near the neurite boundaries.

245 The parameter  $\mu$  (`levelSetMu`) controls the smoothness of the boundary. Smoothing deletes

246 small noisy speckles. Larger  $\mu$  creates smoother boundaries but can also cause small neurites to  
247 disappear. We set  $\mu = 0.1$ . Also important is the number of iterations  $N_{levelset}$  (`levelSetIter`).  
248 It should be large enough to reduce noise and smooth the boundaries, but small enough not to  
249 loose structures due to over-smoothing. In our example we set  $N_{levelset} = 500$ .

250 As the final step, we remove connected pixels with total area smaller than  $A_s$  (`smallArea`).  
251 This removes noise and cleans up the mask (Fig. 3f). In the example we set  $A_s = 1 \mu\text{m}^2$ .

252 Parameters for creating the mask are listed in Table 6.

### 253 **Creating SWC points from the mask**

254 Using the mask, we create the SWC points that describe the dendritic structure. The  $(x, y)$   
255 positions of the SWC points are placed along the centerlines of the mask. The radii  $r$  are set as  
256 the shortest distances to the boundaries of the branches from the centerlines. The  $z$  positions  
257 are computed using the centerlines and the tiff stack.

258 The centerlines of the mask are obtained by skeletonization (Zhang and Suen, 1984). The  
259 skeleton is computed by iterative thinning of the mask based on the pixel values in the 8  
260 neighboring points (Zhang and Suen, 1984) (Fig. 4a). The distance from a pixel in the centerline  
261 to the nearest boundary is computed using the Euclidian distance transformation (Danielsson,  
262 1980) (Fig. 4b).

263 The depths  $z$  of the points on the centerlines of the mask are found in two steps. First,  
264 the centerlines are dissected into  $xy$ -paths (Fig. 4a). The  $xy$ -paths with length smaller than  
265  $l_{sm} = 0.5 \mu\text{m}$  (`smallLen`) are considered as noise and excluded. Second, a  $z$ -image is created by  
266 following the  $xy$ -path and cutting through the tiff stack (Fig. 4c). A dark valley in the  $z$ -image  
267 spanning from the left edge to the right edge indicates the branch whose 2D projection falls on  
268 the  $xy$ -path (Fig. 4c). A line through the valley can be found by evaluating all paths from the left  
269 edge to the right edge (red dotted line in Fig. 4c). Specifically, a left-right path in the  $z$ -image  
270 starts from a point at the left edge. The next point is selected from the three nearby points to  
271 the right (the change in  $z$  is -1, 0, or 1). This process iterates until the right edge is reached. For

272 each left-right path, we compute the weighted distance, which is the sum of the distance between  
 273 consecutive pixels multiplied by a weight  $e^{\alpha_d I}$ , where  $\alpha_d = 20$  (`alphaDistance`) is a parameter  
 274 and  $I$  is the intensity of the right point. The weight penalizes bright pixels, and encourages the  
 275 left-right path to go through dark pixels. The left-right path with minimal weighted distance,  
 276 or the shortest path, is selected. The path follows the dark valley spanning from the left edge  
 277 to the right edge, as shown in Fig. 4c (dotted red line). The  $z$  values of this shortest path gives  
 278 the depth for each point in the  $xy$ -path. A large  $\alpha_d$  ensures that the shortest path follows dark  
 279 pixels. But a value too large can lead to distortions of the path due to dark spots from other  
 280 branches or noise.

Linked SWC points are placed on the  $xy$ -path. The distance between successive SWC points is set to be at least 1.2 times the radii (for points near som, 0.5 times radii). We check the validity of SWC points, remove any invalid ones. Adjacent SWC points are connected along the  $xy$ -path. Removal of invalid SWC points may have created a large distance between two consecutive SWC points; in this case, we do not connect them. The criterion is

$$d_{12} > \alpha_{xy}(r_1 + r_2),$$

where  $d_{12}$  is the Euclidian distance in  $xy$  between the two SWC points;  $r_1, r_2$  are the radii; and  $\alpha_{xy} = 2.0$  (`distFactConn`) is a factor. Sharp turns in  $xy$ -path often result from errors in the skeleton due to crossing branches. To avoid this problem, we do not connect the two SWC points if doing so creates a large angle (greater than  $\theta_{thr} = \pi/3$ , `angle`) between consecutive lines connecting the SWC points. We also do not connection the SWC points if the  $z$  difference between them is too large, as this often leads to errors in connecting branches far way in  $z$ . The criterion is

$$d_z |z_1 - z_2| > \alpha_{zj} d_{xy} (r_1 + r_2),$$

281 where  $d_z = 0.5 \mu m$  is the distance between successive planes in the tiff stack;  $d_{xy} = 0.065 \mu m$  is  
 282 the pixel distance in  $xy$ ; and  $\alpha_{zj} = 3.0$  (`zJumpFact`) is a factor for adjusting the threshold.

283 The parameters for creating SWC points are listed in Table 7.

### 284 **Checking the validity of an SWC point**

285 The SWC points created from the mask can be incorrect. For example, if some branches are  
286 parallel to each other and are very close, they can be merged in the mask, leading to incorrect  
287 SWC points. Therefore it is important to check the validity of the SWC points and reject  
288 incorrect ones. Since the mask can be imperfect, we check the validity not with the mask but  
289 with the original tiff stack. The main idea is that a valid SWC point should sit on the centerline  
290 of a valley in the plane at the depth of the SWC point.

291 Consider an SWC point at  $(x_p, y_p, z_p)$  with radius  $r_p$ . The validity of the point is tested  
292 with the intensity  $I(x, y)$  of pixels in the plane at  $z = z_p$  (Fig. 5a). We take a local square  
293 patch in the plane centered at  $(x_p, y_p)$  with size set to  $\max(4r_p, 2r_{min})$ , where  $r_{min} = 2 \mu m$   
294 (`minRange`). Pixel intensity across the patch can have a tilt, such that one side is much brighter  
295 than the other. This could be due to uneven lighting, or shadows cast by nearby dark neurites.  
296 To reduce the adverse effects of tilt, we least-square fit the intensity with a linear function  
297  $a(x - x_p) + b(y - y_p) + c$ , where  $a, b, c$  are the fitted parameters, and subtract the fitted function  
298 from  $I(x, y)$  in the patch. The results are shifted and scaled so that the intensity range is the  
299 same as that before subtraction.

300 Ideally, the SWC point should be at a local center of a valley in  $I(x, y)$  of a dendritic branch.  
301 To test this, we create a profile of intensity along a line through  $(x_p, y_p)$  and at angle  $\theta$  relative to  
302 the  $x$ -axis (Fig. 5a), and test the existence of an inverse peak. The profile is a one-dimensional  
303 curve  $I_\theta(d)$  (black line, Fig. 5b), where  $d$  is the coordinate of a pixel point on the line, with  
304  $(x_p, y_p)$  set as the origin.  $I_\theta(d)$  is the intensity value at the pixel point. The range of  $|d|$  is  
305 limited to  $d_{max} = \min(2r_p, r_{min})$ . We obtain a smoothed profile  $I_{s,\theta}(d)$  by convolving  $I_\theta(d)$  with  
306 a Gaussian filter with  $\sigma_s = 0.2 \mu m$  (`sigmaSmoothCurve`, green line, Fig. 5b), and detect the  
307 inverse peak in  $I_{s,\theta}$ . We take  $\theta$  to be multiples of  $\pi/8$ . Hence there are 8 profiles (Fig. 5a,c).

308 We evaluate the existence of an inverse peak in the smoothed profile  $I_{s,\theta}$  using two cri-

309 teria. The first criterion ensures that the inverse peak is deep enough. Specifically, we re-  
 310 quire that the local minimum of  $I_{s,\theta}$  near  $(x_p, y_p)$  is smaller than a threshold  $I_{th} = I_b - \alpha_{th}\sigma$   
 311 (gray line, Fig. 5b). Here  $I_b$  is the baseline, and is set to 80 percentile value of the intensity  
 312 in the patch;  $\sigma = 0.03$  (`sigma`) is the estimate of the fluctuation level of the intensity; and  
 313  $\alpha_{th} = 1$  (`factSigmaThreshold`) is an adjustable factor. This factor is increased to  $\alpha_{th} = 2$   
 314 (`factSigmaThreStrict`) during creation of SWC points from the mask to make the validity  
 315 judgement stricter, which reduces noise in the SWC structure. The second criterion ensures  
 316 that the inverse peak has two flanks. This is done by checking that  $I_{s,\theta}$  rises above a threshold  
 317 set at the mean of the maximum and the minimum of  $I_{s,\theta}$  at either side of the local minimum  
 318 point (gray dashed line, Fig. 5b).

319 If the peak is deep enough and there are two flanks, we determine the width of the peak  
 320 starting from the minimum of  $I_{s,\theta}$ . We take a derivative of  $I_{s,\theta}$  and smooth it to get  $dI_s$   
 321 (Fig. 5e). We determine the maximum absolute value of these derivatives  $dI_{\max}$ . Starting from  
 322 the minimum point, we trace the negative part of the derivative. The tracing stops once  $dI_s$   
 323 starts to increase and  $-dI_s > 0.5dI_{\max}$ . This way of stopping ensures that the tracing picks out  
 324 the first significantly large absolute value in the derivative and does not stop because of small  
 325 bumps in  $dI_{s,\theta}$ . Similarly, we trace the positive part of the derivative, and stops when  $dI_s$  starts  
 326 to decrease and  $dI_s > 0.5dI_{\max}$ . If either of these tracing does not stop before reaching the end,  
 327 the peak is invalid. Otherwise, the width  $w$  of the peak is set to the distance between the two  
 328 stopping points (black vertical lines, Fig. 5e). The derivatives of all eight smoothed profiles are  
 329 shown in Fig. 5f. To ensure that fluctuations between the two stopping points are small enough,  
 330 we check the peaks in  $|dI_s|$ . If the maximum of these peaks is larger than  $0.5dI_{\max}$ , the profile  
 331 is judged to have no valid peak.

332 If none of the profiles have valid inverse peaks, the SWC point is invalid. Otherwise, we  
 333 choose the profile with the minimum width among the valid ones, and assign its peak position  
 334 as the position  $(x_m, y_m)$  of the SWC point, and set  $r_m = \alpha_r w/2$ , where the factor  $\alpha_r = 1.0$   
 335 (`factAdjustRadius`) is an adjustable factor introduced to enable the user to adjust the radii

336 of SWC points according to subjective judgement. If the distance between the original position  
337  $(x_p, y_p)$  and  $(x_m, y_m)$  exceeds  $\alpha_{shift}r_m$ , where  $\alpha_{shift} = 2$  (`factShift`), then the SWC point has  
338 shifted too much, and it is flagged as invalid. If  $r_m$  is smaller than  $r_{min} = 0.3 \mu\text{m}$  (`minRadius`)  
339 or larger than  $r_{max} = 10 \mu\text{m}$  (`maxRadius`), the radius of the SWC point is too small or too large,  
340 and the point is invalid.

341 Finally, we check whether the pixels within a radius  $0.5r_m$  from the center are dark enough.  
342 Specifically, we check whether the maximum value of the smoothed profile in the orthogonal  
343 direction (red line, Fig. 5d) to the chosen profile (cyan line, Fig. 5d) within  $0.5r_m$  are smaller  
344 than a threshold (green horizontal line, Fig. 5d), which is set as the maximum smoothed intensity  
345 of the chosen profile at  $r_m$  plus  $\sigma$ . If not, the SWC point is invalid. This check ensures that the  
346 SWC points created along edges of thick dendrites or the soma are eliminated.

347 If the SWC point passes all the tests described above, it is judged as valid, and  $(x_m, y_m, z)$   
348 and  $r_m$  are set as the new position and radius. The position and radius of the SWC are  
349 thus corrected after the validity check. To ensure that the corrections converge, the checking  
350 procedure is iterated three times with the positions and radius updated. The SWC point is  
351 accepted if it passes the tests all three times. The angle  $\theta$  of the profile denotes the orientation  
352 perpendicular to the branch (red line, Fig. 5a).

353 The parameters used in checking the validity of an SWC point are listed in Table 8.

### 354 **Adjusting $z$**

355 Checking validity of an SWC point shifts its  $xy$  position. The shift can be significant, especially  
356 during the creation of SWC points using the mask, since the mask can deviate from the under-  
357 lying neurites significantly if there are close branches. To ensure that  $z$  of the SWC point is  
358 accurate, we further adjust  $z$ . We create the intensity profile along  $z$  at the  $xy$  position (black  
359 line, Fig. 4c), then smooth it with parameter  $\sigma_{s,z} = 2$  (`sigmaSmoothCurveZ`; green line, Fig. 4c).

360 We check the existence of inverse peak in the smoothed profile, similarly as done for the  
361 intensity profiles used for checking validity of SWC points. We estimate the fluctuations in

362 the profile by computing the standard deviation  $\sigma_z$  of the difference between the original and  
 363 the smoothed profiles. We smooth the derivative of the smoothed profile, and determine the  
 364 maximum  $d_{z,max}$  of the absolute values of the derivatives. If  $d_{z,max} < \alpha_z \sigma_z$ , it is judged that  
 365 there is no inverse peak, and the SWC is judged as invalid. Here  $\alpha_z = 0.1$  (`factSmallDerivZ`)  
 366 is a factor. Otherwise, the extent of the inverse peak centered around the original  $z$  position  
 367 is decided by finding the first places away from the center at which the smoothed profile stops  
 368 increasing. A threshold is set to the maximum value at these two ends minus  $\alpha_{th,z} \sigma_z$ . Here  
 369  $\alpha_{th,z} = 1$  (`factSigmaThresholdZ`) is a factor. If the minimum value within the extent is smaller  
 370 than this threshold, the inverse peak is valid, and the  $z$  is adjusted to the position of the  
 371 minimum. Otherwise the SWC is judged invalid.

372 The parameters for adjusting  $z$  are listed in table 9.

### 373 **Mark pixels occupied**

374 To avoid creating duplicated SWC points, we mark pixels in the tiff stack in the vicinity of the  
 375 existing SWC points as occupied. Before creating a new SWC point, we check whether the pixel  
 376 at its center is marked as occupied; if so, the SWC point is not created.

377 The marked pixels around two connected SWC points  $(x_1, y_1, z_1, r_1)$  and  $(x_2, y_2, z_2, r_2)$  are in  
 378 a volume formed by two half cylinders with radii  $\alpha_{occ} r_1$  and  $\alpha_{occ} r_2$ , respectively, and a trapezoidal  
 379 prism that fits with the half cylinders (Fig. 6a). Here  $\alpha_{occ} = 1$  (`factMarkOccXY`) is a parameter  
 380 for adjusting the extent of exclusion in  $xy$ . The  $z$  extent of the marked volume is large enough  
 381 to contain the two SWC points: the distances from the top and bottom planes of the volume  
 382 to the nearest SWC points are set to the maximum of  $\alpha_{occ} r_1$ ,  $\alpha_{occ} r_2$ , or  $z_{occ} = 3 \mu\text{m}$  (`zOcc`).  
 383 Increasing the volume of the marked pixels prevents creations of spurious SWC points. However,  
 384 if the volume is too large, correct SWC points can be eliminated, especially when branches are  
 385 close to each other. These opposing constraints should guide the choice of the appropriate size  
 386 for the volume.

387 The parameters for marking pixels occupied are in Table 10.

### 388 **Thick dendrites and the soma**

389 Thick dendrites and the soma can be missing from the mask created with the valley detectors.  
390 There are two main reasons: (1) their dimensions are much larger than the length scale of the  
391 valley detectors; (2) the intensities of the pixels inside them are uniform. Consequently, only  
392 the pixels at their boundaries show up in the mask. This leads to the error of no SWC points  
393 for these structures. To correct this problem, we check the existence of thick dendrite and the  
394 soma in each tiff stack. The check is based on the observation that these structures are typically  
395 well stained and the pixels in them are very dark.

396 Specifically, we create and compare two 2D projections of the tiff stack. In the first one, we  
397 only project the pixels that are marked occupied because they are in the vicinity of the existing  
398 SWC points. We enlarge the marked volume by increasing  $\alpha_{occ}$  and  $z_{occ}$  to three times of the  
399 original values. This is to ensure that all pixels associated with the dendrites already covered  
400 the SWC points, including the shadows the dendrites in the out-of-focus planes, and completely  
401 marked. From this 2D projection we determine a threshold, which is set to the intensity of the  
402 darkest 5% of pixels. This threshold indicates the darkness of the pixels covered by the existing  
403 SWC points.

404 In the second 2D projection, we project only the pixels that are not marked occupied. We  
405 then count the number of pixels that are darker than the threshold determined from the first  
406 2D projection. If this number is larger than the number of pixels in an area  $0.5L_{soma}^2$ , where  
407  $L_{soma} = 2 \mu m$  (`somaLengthScale`) is the length scale of the soma, we decide that the tiff stack  
408 contains thick dendrite and/or the soma since there are significant number of dark pixels that  
409 are uncovered by the SWC points.

410 To place SWC points on thick dendrites and the soma, we create a 2D projection of the tiff  
411 stack with all pixels, smooth it, and create a mask by selecting top  $\theta_{soma} = 0.08$  (`somaSparseThr`)  
412 fraction of the darkest pixels. From the mask we create SWC points as described before. SWC  
413 points are created only if their positions are not marked occupied by the existing SWC points,  
414 using the original values of  $\alpha_{occ}$  and  $z_{occ}$ .



415 The parameters for creating SWC points for thick dendrites and soma are listed in Table 11.

### 416 **Extending SWC points in 3D**

417 The SWC structures created from the masks are often incomplete, mostly due to the limitations  
418 of the masks in separating nearby branches in 2D projections. These branches could be well  
419 separated in the tiff stack although their 2D projections are not; therefore it is useful to extend  
420 the SWC structure using the tiff stack.

421 To minimize the interference from noise, we delete isolated SWC points that are not con-  
422 nected to any other SWC points. To ensure that the extension does not create duplicated SWC  
423 points, we mark pixels nearby the existing SWC points occupied (red circles, Fig. 6b). From an  
424 end SWC point  $(x, y, z, r)$  (yellow circle, Fig. 6b), we search the plane at  $z$  for the candidate for  
425 the next point. To reduce noisy fluctuations, the pixel intensity in the plane is smoothed with  
426 a Gaussian filter with  $\sigma = 2$  pixels.

427 The search is done by finding a path starting from the end point and through the neurite  
428 (white line, Fig. 6b). To do so, we draw an arc (blue arc, Fig. 6b) of radius  $r_{search} = 3 \mu\text{m}$   
429 (`searchMax`), or  $(\alpha_{s,m} + 2)r$ , whichever is greater. Here  $\alpha_{s,m} = 1.2$  (`factSearchMin`) is a factor.  
430 The arc is restricted to a range of angle ( $\theta_{thr} = \pi/3$ , `angle`), where the angle is between the line  
431 from a pixel in the arc to the end point (black lines, Fig. 6b) and the line from the end point  
432 to its connected SWC point (yellow line, Fig. 6b). From each point on the arc, we compute the  
433 intensity weighted shortest distance path to the end point (black line, Fig. 6c). The resulting  
434 profile of the distance is Gaussian smoothed with parameter 2.0 (green line, Fig. 6c). The  
435 standard deviation of the difference between the original and the smoothed profiles is taken  
436 as the reference for the fluctuations in the distances. We then search for the significant local  
437 minima in the smoothed profile. To be significant, the local minimum must be smaller than a  
438 threshold set to the mean of the maximum and the minimum of the smoothed profile, minus  
439  $\alpha_{DD}$  times the standard deviation. Here  $\alpha_{DD} = 20$  (`factSigmaDD`) is a factor.

440 The shortest paths from the local minima to the end point are used to place the next SWC

441 point. When there are multiple paths, each path is tested sequentially. The depth of the neurite  
 442 along a chosen path is computed using the xy-path technique. Starting from the end point and  
 443 following the path, we test placing a new SWC point  $x_c, y_c, z_c, r_c$ . We test the validity of the  
 444 candidate SWC point, which also adjusts  $x_c, y_c$  and  $r_c$ . The validity test is done three times.  
 445 If the distance from  $(x_c, y_c)$  to  $(x, y)$  is smaller than  $\alpha_{s,m}r$ , it is not accepted. If the candidate  
 446 point passes all three tests, we check if it is near an existing SWC point; if so, we check whether  
 447 the existing SWC point is connectable to the end point. If connectable, the existing SWC point  
 448 is added to the candidate pool for connecting the end point to the existing SWC points. If a  
 449 valid candidate point does not come close to the existing SWC points, and it is connectable to  
 450 the end point, we create a new SWC point at  $(x_c, y_c, z_c)$  with radius  $r_c$ . It is connected to the  
 451 end point, and serves as a new end point from which the extension continues. If no new SWC  
 452 point is created after checking all paths, we check the list of candidates for connections, and  
 453 select the one with the minimum distance and connect it to the end point.

454 The parameters used in extending SWC points are listed in Table 12.

### 455 **Connecting broken segments**

456 After extending SWC points in 3D, a continuous branch can still be represented with broken  
 457 segments of SWC points, especially if the underlying signal is weak or there are closely crossing  
 458 branches (Fig. 2b,c). We connect these segments with heuristic rules to recover the branch  
 459 continuity. To do so, we compute the Euclidean distance between all pairs of end points that  
 460 are not connected and the differences in  $z$  are within the allowed range as described before. If  
 461 the distance of the pair in  $xy$  is smaller than  $1.5(r_1 + r_2)$ , where  $r_1, r_2$  are the radii, they are  
 462 judged to be close to each other and are connected.

463 After connecting the nearby pairs, we consider more distant ones. If the two end points  
 464 are within  $\alpha_{xy}(r_1 + r_2)$  in  $xy$ , where  $\alpha_{xy} = 2$  (`distFactConn`) is a factor; and if the angles  
 465 between the two lines, linking the end points to their respective connected SWC points, is  
 466 smaller than  $\theta_{thr} = \pi/3$  (`angle`); then the two points are preserved in the candidate pool

467 for potential connections. We then iteratively connect the pairs of end points in the pool,  
468 connecting the closest available pairs first. Once connected, the end points are excluded from  
469 further connections. This pairwise connection stops if the pairs are all considered or if further  
470 connections create loops in the SWC structure.

471 The parameters used in connecting end points are listed in Table 13.

### 472 **Subdividing tiff stack in $z$**

473 The 2D projection can be complicated when there are many branches in one stack. This often  
474 leads to occlusions in the 2D projection and missed branches in the reconstruction. One way of  
475 mitigating this problem is to divide the tiff stack in  $z$  into  $n_{div} = 8$  (`nSplit`) slabs with equal  
476 heights in  $z$ . We create SWC points separately for each slab. When creating the 2D projection  
477 for a slab, we include extra volume in  $z$  by extending the height in both directions by  $z_{ext} = 3 \mu\text{m}$   
478 (`zext`). This is useful for getting good projections of branches that are near the dividing planes  
479 between the slabs. The  $z$ -image also includes the extended volume. Any SWC points whose  
480 depths are beyond the slab boundary are deleted. The extension from the end points are done  
481 with the entire tiff stack, which helps to connect SWC points that belong to the same branch  
482 but are cut by the subdivision.

483 The parameters of subdivision are listed in Table 14.

### 484 **Combining SWCs for the entire neuron**

485 The image of an entire neuron consists of multiple tiff stacks stitched together (Fig. 8a). The  
486 coordinates of the stacks relative to the first stack are determined during the stitching. For each  
487 stack we obtain the SWC structure, and shift the positions of the SWC points by the relative  
488 coordinates of the stack. The SWC points of individual stacks are read-in sequentially. To avoid  
489 duplicated SWC points in the overlapping regions of adjacent stacks, pixels near the SWC points  
490 that are already created are marked occupied by setting the parameters  $z_{occ}$  5 times of the usual  
491 value and  $r_{occ}$  2 times. If the position of SWC points are at the marked pixels, they are deleted.

492 For individual stacks, the step of connecting the end points is omitted. Instead, after reading in  
493 the SWC points of all stacks, we extend the SWC points from the end points, and then connect  
494 the new end points. To eliminate noise, we delete very short leaf branches in the SWC structure  
495 (those that have fewer than  $n_{dmin} = 5$  SWC points, `minNumPointsBr`). In addition, we eliminate  
496 isolated branches that are shorter than  $l_{min,iso} = 20 \mu\text{m}$  (`minLenBrIso`). Increasing this number  
497 reduces noise in the reconstruction, but can also delete some of the correct reconstruction. The  
498 reconstructed SWC structure for the example neuron is shown in Fig. 8b-d.

499 The parameters are listed in Table 15.

## 500 References

- 501 Acciai L, Soda P, Iannello G (2016) Automated neuron tracing methods: an updated account.  
502 *Neuroinformatics* 14:353–367.
- 503 Danielsson PE (1980) Euclidean distance mapping. *Computer Graphics and image process-*  
504 *ing* 14:227–248.
- 505 Lankton S (2009) Sparse Field Methods - Technical Report. *Georgia Institute of Technology*  
506 *Techniacal Report* .
- 507 Whitaker RT (1998) A Level-Set Approach to 3D Reconstruction from Range Data. *Interna-*  
508 *tional Journal of Computer Vision* 29:203–231.
- 509 Zhang TY, Suen CY (1984) A fast parallel algorithm for thinning digital patterns. *Communi-*  
510 *cations of the ACM* 27:239–242.

| Shortcut   | Function                                         | Note                                                                                                              |                                           |
|------------|--------------------------------------------------|-------------------------------------------------------------------------------------------------------------------|-------------------------------------------|
| Ctrl/Cmd+A | Select all SWC points                            |                                                                                                                   |                                           |
| h          | Turn on selection mode (show hints too) then:    | Hold <b>Shift</b> to trigger a selection directly.<br>Example: <b>Shift+1</b> selects downstream points directly. |                                           |
|            | 1                                                |                                                                                                                   | select downstream points                  |
|            | 2                                                |                                                                                                                   | select upstream points                    |
|            | 3                                                |                                                                                                                   | select neighboring points                 |
|            | 4                                                |                                                                                                                   | select passing branches                   |
|            | 5                                                |                                                                                                                   | select connected points                   |
|            | 6                                                |                                                                                                                   | inverse selection                         |
| Shift+r    | Draw selection rectangle holding the mouse then: | For 3D View only.<br>Hold <b>Shift</b> to append selection.                                                       |                                           |
|            | s                                                |                                                                                                                   | select points in the rectangle            |
|            | t                                                |                                                                                                                   | select trees in the rectangle             |
|            | Ctrl/Cmd+t                                       |                                                                                                                   | select terminal branches in the rectangle |

Table 1: Shortcut keys for selecting SWC points. **Ctrl/Cmd** means substituting **Ctrl** for **Command** in Mac.

|                    |                                                                               |                                                                    |
|--------------------|-------------------------------------------------------------------------------|--------------------------------------------------------------------|
| Backspace/Delete/x | Delete selected objects                                                       |                                                                    |
| c                  | Connect selected SWC points                                                   |                                                                    |
| n                  | Connect to the nearest SWC points<br>(only works for a single selected point) |                                                                    |
| b                  | Break SWC connections                                                         |                                                                    |
| i                  | Insert between selected points                                                |                                                                    |
| q/<                | Decrease radius                                                               |                                                                    |
| e/>                | Increase radius                                                               |                                                                    |
| Ctrl/Cmd+g         | Turn on adding new SWC point                                                  |                                                                    |
| Space              | Extend from selected point                                                    |                                                                    |
| R                  | Turn on painting mask                                                         | For 2D projection only                                             |
| Ctrl/Cmd+e         | Turn on erasing mask                                                          |                                                                    |
| a                  | Move selected SWC points to left.                                             | For 2D projection only.<br>Hold <b>Shift</b> for<br>fast movement. |
| d                  | Move selected SWC points to right                                             |                                                                    |
| w                  | Move selected SWC points up                                                   |                                                                    |
| s                  | Move selected SWC points down                                                 |                                                                    |
| Ctrl/Cmd+z         | Undo                                                                          |                                                                    |
| Ctrl/Cmd+Shift+z   | Redo                                                                          |                                                                    |

Table 2: Shortcut keys for editing SWC structure. / denotes equivalent keys.

|                |                                                            |
|----------------|------------------------------------------------------------|
| z              | Locate selected SWC points in Stack View                   |
| =              | Zoom in                                                    |
| -              | Zoom out                                                   |
| Arrows         | Rotate                                                     |
| Shift Arrows   | Move                                                       |
| Ctrl/Cmd+s     | Save SWC structure to file                                 |
| Ctrl/Cmd+Plus  | Increase SWC size scale                                    |
| Ctrl/Cmd+Minus | Decrease SWC size scale                                    |
| Ctrl/Cmd+g     | Change SWC display mode                                    |
| Ctrl/Cmd+b     | Toggle the mode of displaying neurons in the tile box only |

Table 3: Shortcut keys for visualization of SWC structure in 3D View.

|               |                             |                                     |
|---------------|-----------------------------|-------------------------------------|
| =             | Zoom in                     |                                     |
| -             | Zoom out                    |                                     |
| a             | Move image to left.         | Hold <b>Shift</b> for fast movement |
| d             | Move image to right         |                                     |
| w             | Move image up               |                                     |
| s             | Move image down             |                                     |
| Left Arrow/e  | Decrease z position of slab |                                     |
| Right Arrow/q | Increase z position of slab |                                     |

Table 4: Shortcut keys for 2D Projection View.

| Parameter  | Name      | Value               | Meaning                              |
|------------|-----------|---------------------|--------------------------------------|
| $d_{xy}$   | xyDist    | 0.065 $\mu\text{m}$ | pixel distance in xy                 |
| $d_z$      | zDist     | 0.5 $\mu\text{m}$   | z-distance between successive planes |
| $\sigma_b$ | sigmaBack | 2 $\mu\text{m}$     | length scale for smooth background   |

Table 5: Parameters for tiff stacks and 2D projections. Names of the parameters appear in the file containing parameters for automated reconstruction.

| Parameter        | Name           | Value               | Meaning                                |
|------------------|----------------|---------------------|----------------------------------------|
| $\sigma$         | sigmaFilter    | 0.1 $\mu\text{m}$   | length scale of valley detector        |
| $\alpha_\lambda$ | lambdaRatioThr | 10                  | factor for eliminating circular blobs  |
| $f_\lambda$      | sparse         | 0.1                 | fraction for determining the threshold |
| $\mu$            | levelSetMu     | 0.1                 | parameter for level set smoothing      |
| $N_{levelset}$   | levelSetIter   | 500                 | number of level set iterations         |
| $A_s$            | smallArea      | 1.0 $\mu\text{m}^2$ | threshold for small areas removed      |

Table 6: Parameters for creating the binary mask.

| Parameter      | Name          | Value             | Meaning                                             |
|----------------|---------------|-------------------|-----------------------------------------------------|
| $l_{sm}$       | smallLen      | 0.5 $\mu\text{m}$ | smallest length of xy-path used                     |
| $\alpha_d$     | alphaDistance | 20                | factor for weighting distance between pixels        |
| $\alpha_{xy}$  | distFactConn  | 2                 | factor for disconnecting two consecutive SWC points |
| $\theta_{thr}$ | angle         | $\pi/3$           | maximum angle allowed between consecutive lines     |
| $\alpha_{zj}$  | zJumpFact     | 3                 | factor for z jump threshold                         |

Table 7: Parameters for creating SWC points from 2D mask.

| Parameter        | Name                     | Value             | Meaning                                       |
|------------------|--------------------------|-------------------|-----------------------------------------------|
| $r_{min}$        | minRange                 | 2 $\mu\text{m}$   | lower bound for the range of the profiles     |
| $\sigma_s$       | sigmaSmoothCurve         | 0.2 $\mu\text{m}$ | length scale for smoothing profiles           |
| $\sigma$         | sigma                    | 0.03              | estimate of fluctuations in the intensity     |
| $\alpha_{th}$    | factSigmaThreshold       | 1                 | factor for determining the threshold for peak |
| $\alpha_{th,s}$  | factSigmaThresholdStrict | 2                 | strict factor for the threshold for peak      |
| $\alpha_{shift}$ | factShift                | 2                 | factor for allowing shifts in the position    |
| $r_{min}$        | minRadius                | 0.2 $\mu\text{m}$ | lower bound for the radius                    |
| $r_{max}$        | maxRadius                | 10 $\mu\text{m}$  | upper bound for the radius                    |
| $\alpha_r$       | factAdjustRadius         | 1.0               | factor for adjusting the radius               |

Table 8: Parameters for checking validity of an SWC point.

| Parameter       | Name                       | Value | Meaning                                                |
|-----------------|----------------------------|-------|--------------------------------------------------------|
| $\sigma_{s,z}$  | <b>sigmaSmoothCurveZ</b>   | 2     | parameter for smoothing $z$ profile                    |
| $\alpha_z$      | <b>factSmallDerivZ</b>     | 0.1   | factor for determining the significance of derivatives |
| $\alpha_{th,z}$ | <b>factSigmaThresholdZ</b> | 1     | factor for determining the threshold for inverse peak  |

Table 9: Parameters for adjusting  $z$  of an SWC point.

| Parameter      | Name                 | Value           | Meaning                                          |
|----------------|----------------------|-----------------|--------------------------------------------------|
| $\alpha_{occ}$ | <b>factMarkOccXY</b> | 1               | factor for adjusting radius of the marked volume |
| $z_{occ}$      | <b>zOcc</b>          | $3 \mu\text{m}$ | lower bound for extend of the volume in $z$      |

Table 10: Parameters for marking pixels near the SWC points occupied.

| Parameter       | Name                   | Value           | Meaning                                     |
|-----------------|------------------------|-----------------|---------------------------------------------|
| $L_{soma}$      | <b>somaLengthScale</b> | $2 \mu\text{m}$ | length scale of the soma                    |
| $\theta_{soma}$ | <b>somaSparseThr</b>   | 0.05            | fraction for the threshold of creating mask |

Table 11: Parameters for creating SWC points for thick dendrites and the soma.

| Parameter      | Name                 | Value           | Meaning                                          |
|----------------|----------------------|-----------------|--------------------------------------------------|
| $r_{search}$   | <b>searchMax</b>     | $3 \mu\text{m}$ | radius for searching the next point              |
| $\alpha_{s,m}$ | <b>factSearchMin</b> | 1.2             | factor for the minimum distance to the end point |

Table 12: Parameters for extending SWC points in 3D.

| Parameter     | Name                | Value | Meaning                                        |
|---------------|---------------------|-------|------------------------------------------------|
| $\alpha_{xy}$ | <b>distFactConn</b> | 2     | factor for judging the closeness of end points |

Table 13: Parameters for connecting end points.

| Parameter | Name          | Value           | Meaning                                         |
|-----------|---------------|-----------------|-------------------------------------------------|
| $n_{div}$ | <b>nSplit</b> | 8               | number of subdivisions                          |
| $z_{ext}$ | <b>zext</b>   | $3 \mu\text{m}$ | extension of sub-slabs when creating SWC points |

Table 14: Parameters for subdividing a tiff stack.

| Parameter     | Name                  | Value            | Meaning                                       |
|---------------|-----------------------|------------------|-----------------------------------------------|
| $n_{dmin}$    | <b>minNumPointsBr</b> | 5                | minimum number of SWC points allowed in leafs |
| $l_{min,iso}$ | <b>minLenBrIso</b>    | $20 \mu\text{m}$ | minimum length allowed in isolated branches   |

Table 15: Parameters for reducing noise in SWC structure.
